# Supplementary material for: Factors influencing focused practice: A qualitative study of resident and early-career family physician practice choices
Source: bioRxiv or medRxiv preprint supplement (doi:10.1101/2021.06.24.21259486), 2021-06-26
Supplement: Supplementary file [file media-2.pdf]

## COREQ Checklist – dated May 14, 2021

| Item                                           | Guide questions/description                                                                                                                              | Response and page number referenced                                                                                                                                                                                                   |
|------------------------------------------------|----------------------------------------------------------------------------------------------------------------------------------------------------------|---------------------------------------------------------------------------------------------------------------------------------------------------------------------------------------------------------------------------------------|
| <i>Domain 1: Research team and reflexivity</i> |                                                                                                                                                          |                                                                                                                                                                                                                                       |
| 1. Interviewer/facilitator                     | Which author/s conducted the interview or focus group?                                                                                                   | Page 6:<br>“One research analyst (ER, LJ, MM) per province conducted one-on-one semi-structured, in-depth interviews.”                                                                                                                |
| 2. Credentials                                 | What were the researcher’s credentials? e.g. PhD, MD                                                                                                     | Research credentials are provided in the author list (page 1).                                                                                                                                                                        |
| 3. Occupation                                  | What was their occupation at the time of the study?                                                                                                      | Researchers completing data collection and analysis were employed as research analysts for the study.                                                                                                                                 |
| 4. Gender                                      | Was the researcher male or female?                                                                                                                       | All three research analysts were female. This detail was not included in the manuscript as the interviewer’s gender did not have a bearing on the content of interviews.                                                              |
| 5. Experience and training                     | What experience or training did the researcher have?                                                                                                     | Page 6:<br>“Each research analyst was trained in qualitative interviewing.”                                                                                                                                                           |
| 6. Relationship established                    | Was a relationship established prior to study commencement?                                                                                              | N/A                                                                                                                                                                                                                                   |
| 7. Participant knowledge of the interviewer    | What did the participants know about the researcher? e.g. personal goals, reasons for doing the research                                                 | Page 5:<br>“Participants were provided with information about the study, the study rationale, and the names of research team members.”                                                                                                |
| 8. Interviewer characteristics                 | What characteristics were reported about the interviewer/facilitator? e.g. Bias, assumptions, reasons and interests in the research topic                | Page 5:<br>“We provided participants with study information and an honorarium.”<br><br>Study information included a list of the research team members.                                                                                |
| <i>Domain 2: Study design</i>                  |                                                                                                                                                          |                                                                                                                                                                                                                                       |
| 9. Methodological orientation and Theory       | What methodological orientation was stated to underpin the study? e.g. grounded theory, discourse analysis, ethnography, phenomenology, content analysis | Page 7:<br>“We used iterative, inductive thematic analysis.[18]”<br><br>Page 7:<br>“We conducted comparative analysis[21] to compare thematic patterns identified from the early-career FP transcripts with the resident FP dataset.” |
| 10. Sampling                                   | How were participants selected? e.g. purposive, convenience, consecutive, snowball                                                                       | Page 5:<br>“We used purposeful sampling to maximize variation across self-identified gender, marital status, dependents, training location, years of training, years                                                                  |

|                                  |                                                                                   |                                                                                                                                                                                                                                                                                                                                                                                                                                                                                     |
|----------------------------------|-----------------------------------------------------------------------------------|-------------------------------------------------------------------------------------------------------------------------------------------------------------------------------------------------------------------------------------------------------------------------------------------------------------------------------------------------------------------------------------------------------------------------------------------------------------------------------------|
|                                  |                                                                                   | in practice, scope of practice, and practice models in each province.”                                                                                                                                                                                                                                                                                                                                                                                                              |
| 11. Method of approach           | How were participants approached? e.g. face-to-face, telephone, mail, email       | Page 5:<br>“We recruited resident and early-career FPs for the qualitative arm of this larger mixed methods study through family medicine residency programs, social media, research conferences, and selected provincial medical associations.”                                                                                                                                                                                                                                    |
| 12. Sample size                  | How many participants were in the study?                                          | Page 5:<br>“We interviewed 31 of 32 resident FPs and 63 of 69 early-career FPs who had been invited to participate in the larger mixed methods study.”<br><br>Page 6:<br>“The sample used in this paper consists of 22 resident FPs and 38 early-career FPs who: i) self-identified in the screening survey as intending to practice or currently practicing within a focused area, and/or ii) described focused practice elements in their overall practice during the interview.” |
| 13. Non-participation            | How many people refused to participate or dropped out? Reasons?                   | Page 5:<br>“Reasons for nonparticipation included scheduling conflicts (n=2), no response (n=4), or withdrawal with no reason provided (n=1).”                                                                                                                                                                                                                                                                                                                                      |
| 14. Setting of data collection   | Where was the data collected? e.g. home, clinic, workplace                        | Page 6:<br>“Telephone interviews were conducted using a semi-structured interview guide specific to each subgroup (see Appendix 2).”<br><br>Given that interviews were conducted via telephone or videoconference, participants were able to participate from a location of their choosing.                                                                                                                                                                                         |
| 15. Presence of non-participants | Was anyone else present besides the participants and researchers?                 | Page 6:<br>“One research analyst (ER, LJ, MM) per province conducted one-on-one semi-structured, in-depth interviews.”                                                                                                                                                                                                                                                                                                                                                              |
| 16. Description of sample        | What are the important characteristics of the sample? e.g. demographic data, date | Planned practice characteristics of resident family physicians are presented in Table 1 (page 9).<br><br>Practice characteristics of early-career family physicians are presented in Table 2 (page 10).                                                                                                                                                                                                                                                                             |

|                                        |                                                                               |                                                                                                                                                                                                                                                                                                                                                                                                                         |
|----------------------------------------|-------------------------------------------------------------------------------|-------------------------------------------------------------------------------------------------------------------------------------------------------------------------------------------------------------------------------------------------------------------------------------------------------------------------------------------------------------------------------------------------------------------------|
| 17. Interview guide                    | Were questions, prompts, guides provided by the authors? Was it pilot tested? | Page 5:<br>“Telephone interviews were conducted using a semi-structured interview guide specific to each subgroup (see Appendix 2).”                                                                                                                                                                                                                                                                                    |
| 18. Repeat interviews                  | Were repeat interviews carried out? If yes, how many?                         | N/A                                                                                                                                                                                                                                                                                                                                                                                                                     |
| 19. Audio/visual recording             | Did the research use audio or visual recording to collect the data?           | Page 6:<br>“Interviews were audio-recorded and transcribed verbatim.”                                                                                                                                                                                                                                                                                                                                                   |
| 20. Field notes                        | Were field notes made during and/or after the interview or focus group?       | Page 6:<br>“Research analysts recorded their reflections and interview summaries after each interview.”                                                                                                                                                                                                                                                                                                                 |
| 21. Duration                           | What was the duration of the interviews or focus group?                       | Page 5: “Selected individuals were then invited to participate in a 60-minute interview.”                                                                                                                                                                                                                                                                                                                               |
| 22. Data saturation                    | Was data saturation discussed?                                                | Page 6: “Participant recruitment occurred iteratively until no new themes were identified in interviews.”                                                                                                                                                                                                                                                                                                               |
| 23. Transcripts returned               | Were transcripts returned to participants for comment and/or correction?      | Page 7:<br>“We used accepted strategies for validating qualitative research.[22] The findings were: i) triangulated across a large sample size of participants with diverse experiences from three provinces and two types of participant groups;[23] and ii) presented to FP members of the research team (DS, IS, GM), who were not involved in the analysis process for this paper, to confirm data interpretation.” |
| <i>Domain 3: Analysis and findings</i> |                                                                               |                                                                                                                                                                                                                                                                                                                                                                                                                         |
| 24. Number of data coders              | How many data coders coded the data?                                          | Page 7:<br>“For the qualitative arm of the larger mixed methods study, three research analysts (ER, LJ, MM) with experience in qualitative analysis generated initial resident and early-career FP codebooks through inductive coding of one resident and one early-career FP interview.[19]”                                                                                                                           |
| 25. Description of the coding tree     | Did authors provide a description of the coding tree?                         | Page 7:<br>“For the qualitative arm of the larger mixed methods study, three research analysts (ER, LJ, MM) with experience in qualitative analysis generated initial resident and early-career FP codebooks through inductive coding of one resident and one early-career FP interview.[19] Codebooks were then refined through application to a subset of transcripts                                                 |

|                                  |                                                                                                                                   |                                                                                                                                                                                                                                                                                                                                                                                                  |
|----------------------------------|-----------------------------------------------------------------------------------------------------------------------------------|--------------------------------------------------------------------------------------------------------------------------------------------------------------------------------------------------------------------------------------------------------------------------------------------------------------------------------------------------------------------------------------------------|
|                                  |                                                                                                                                   | with guidance from the senior author (AG).”                                                                                                                                                                                                                                                                                                                                                      |
| 26. Derivation of themes         | Were themes identified in advance or derived from the data?                                                                       | Page 7:<br>“We used iterative, inductive thematic analysis.[18] For the qualitative arm of the larger mixed methods study, three research analysts (ER, LJ, MM) with experience in qualitative analysis generated initial resident and early-career FP codebooks through inductive coding of one resident and one early-career FP interview.[19]”                                                |
| 27. Software                     | What software, if applicable, was used to manage the data?                                                                        | Page 7:<br>“The research analysts used the final codebook to code transcripts from their respective provinces in NVivo 12[20].”                                                                                                                                                                                                                                                                  |
| 28. Participant checking         | Did participants provide feedback on the findings?                                                                                | N/A                                                                                                                                                                                                                                                                                                                                                                                              |
| 29. Quotations presented         | Were participant quotations presented to illustrate the themes / findings? Was each quotation identified? e.g. participant number | Page 11:<br>“Themes are described in detail in Table 3 with illustrative quotations.”<br><br>Quotations in Table 3 are identified by participant number.                                                                                                                                                                                                                                         |
| 30. Data and findings consistent | Was there consistency between the data presented and the findings?                                                                | The findings were derived from the data using an inductive approach (see page 7), and therefore are consistent with the data presented.                                                                                                                                                                                                                                                          |
| 31. Clarity of major themes      | Were major themes clearly presented in the findings?                                                                              | Page 11: “We identified three key and three minor themes of influential factors that helped explain participants’ decisions to pursue focused practice. ... Themes are described in detail in Table 3 with illustrative quotations.”<br><br>Themes are clearly presented both in the body of the paper, and in Table 3, where representative participant quotations are provided for each theme. |
| 32. Clarity of minor themes      | Is there a description of diverse cases or discussion of minor themes?                                                            | Page 11:<br>“We identified three key and three minor themes of influential factors that helped explain participants’ decisions to pursue focused practice. Key themes were prominent across both resident and early-career FP datasets, while minor themes were less salient in the data.”                                                                                                       |
